# Supplementary material for: Phytochemical Composition and Biological Activities of Extracts from Early, Mature, and Germinated Somatic Embryos of Cotyledon orbiculata L
Source: MDPI journal article supplement (doi:10.3390/plants12051065), 2023-02-27
Supplement: s1 [file s1]

# Phytochemical composition and biological activities of extracts from early, mature, and germinated somatic embryos of *Cotyledon orbiculata* L.

Gokhan Zengin <sup>1</sup>, Zoltán Cziáky <sup>2</sup>, József Jekő <sup>2</sup>, Kyung Won Kang <sup>3</sup>, José Manuel Lorenzo <sup>4,5</sup>, and Iyyakkannu Sivanesan <sup>6,\*</sup>

<sup>1</sup> Department of Biology, Faculty of Science, Selcuk University, 42250 Konya, Turkey

<sup>2</sup> Agricultural and Molecular Research and Service Institute, University of Nyíregyháza, Nyíregyháza, Hungary

<sup>3</sup> Babo Orchid Farm, Gyeonggi-do, 472-831 Namyangju-si, South Korea

<sup>4</sup> Centro Tecnológico de la Carne de Galicia, Rúa Galicia Nº 4, Parque Tecnológico de Galicia, San Cibrao das Viñas, 32900 Ourense, Spain

<sup>5</sup> Facultade de Ciencias, Universidade de Vigo, Área de Tecnoloxía dos Alimentos, 32004 Ourense, Spain

<sup>6</sup> Department of Bioresources and Food Science, Institute of Natural Science and Agriculture, Konkuk University, 05029 Seoul, South Korea

\* Correspondence: isivanesan@gmail.com or siva74@konkuk.ac.kr; Tel.: +82-2450-0576

**Table S1.** Chemical composition of early somatic embryo extract.

| No.             | Name                                                                  | Formula                                         | Rt    | [M+H] <sup>+</sup> | [M-H] <sup>-</sup> | Fra 1    | Fra 2    | Fra 3    | Fra 4    | Fra 5    |
|-----------------|-----------------------------------------------------------------------|-------------------------------------------------|-------|--------------------|--------------------|----------|----------|----------|----------|----------|
| 1               | Trigonelline                                                          | C <sub>7</sub> H <sub>7</sub> NO <sub>2</sub>   | 1.27  | 138.05550          |                    | 110.0603 | 96.0450  | 94.0656  | 92.0499  | 65.0391  |
| 2               | Nicotinic acid (Niacin)                                               | C <sub>6</sub> H <sub>5</sub> NO <sub>2</sub>   | 1.49  | 124.03986          |                    | 96.0449  | 80.0501  | 78.0345  |          |          |
| 3               | Nicotinamide                                                          | C <sub>6</sub> H <sub>6</sub> N <sub>2</sub> O  | 1.61  | 123.05584          |                    | 106.0289 | 96.0449  | 80.0501  |          |          |
| 4 <sup>1</sup>  | Gallic acid (3,4,5-Trihydroxybenzoic acid)                            | C <sub>7</sub> H <sub>6</sub> O <sub>5</sub>    | 2.73  |                    | 169.01370          | 125.0225 | 97.0281  | 81.0330  | 69.0330  |          |
| 5               | Phenethylamine                                                        | C <sub>8</sub> H <sub>11</sub> N                | 4.30  | 122.09698          |                    | 105.0702 | 103.0545 | 79.0548  |          |          |
| 6               | Dihydroxybenzoic acid                                                 | C <sub>7</sub> H <sub>6</sub> O <sub>4</sub>    | 10.55 |                    | 153.01879          | 123.0073 | 109.0280 | 108.0202 | 95.0123  | 85.0279  |
| 7               | Caffeic acid                                                          | C <sub>9</sub> H <sub>8</sub> O <sub>4</sub>    | 15.25 |                    | 179.03444          | 135.0438 | 107.0487 |          |          |          |
| 8 <sup>1</sup>  | Taxifolin (Dihydroquercetin)                                          | C <sub>15</sub> H <sub>12</sub> O <sub>7</sub>  | 19.95 |                    | 303.05048          | 285.0404 | 177.0181 | 175.0385 | 153.0182 | 125.0229 |
| 9               | cis-3-[(4-hydroxy-3-methoxyphenyl)-prop-2-enoyl]oxybutanedioic acid   | C <sub>14</sub> H <sub>14</sub> O <sub>8</sub>  | 20.64 | 311.07670          |                    | 177.0545 | 149.0597 | 145.0284 | 117.0337 | 89.0390  |
| 10              | Eriodictyol-O-hexoside                                                | C <sub>21</sub> H <sub>22</sub> O <sub>11</sub> | 20.85 |                    | 449.10839          | 287.0562 | 151.0023 | 135.0438 | 107.0123 |          |
| 11              | trans-3-[(4-hydroxy-3-methoxyphenyl) prop-2-enoyl]oxybutanedioic acid | C <sub>14</sub> H <sub>14</sub> O <sub>8</sub>  | 21.50 | 311.07670          |                    | 177.0546 | 149.0598 | 145.0284 | 117.0337 | 89.0390  |
| 12              | Luteolin-O-hexoside isomer 1                                          | C <sub>21</sub> H <sub>20</sub> O <sub>11</sub> | 22.45 |                    | 447.09274          | 327.0519 | 285.0405 | 284.0328 | 256.0368 | 151.0023 |
| 13              | Luteolin-O-hexoside isomer 2                                          | C <sub>21</sub> H <sub>20</sub> O <sub>11</sub> | 22.92 |                    | 447.09274          | 327.0511 | 285.0405 | 284.0327 | 256.0369 | 151.0026 |
| 14              | Hyperoside (Quercetin-3-O-galactoside)                                | C <sub>21</sub> H <sub>20</sub> O <sub>12</sub> | 23.26 |                    | 463.08765          | 301.0362 | 300.0276 | 271.0248 | 255.0297 | 178.9977 |
| 15 <sup>1</sup> | Isoquercitrin (Quercetin-3-O-glucoside)                               | C <sub>21</sub> H <sub>20</sub> O <sub>12</sub> | 23.50 |                    | 463.08765          | 301.0356 | 300.0275 | 271.0248 | 255.0294 | 178.9975 |
| 16 <sup>1</sup> | Eriodictyol (3',4',5,7-Tetrahydroxyflavanone)                         | C <sub>15</sub> H <sub>12</sub> O <sub>6</sub>  | 25.46 |                    | 287.05556          | 269.0453 | 151.0023 | 135.0438 | 125.0228 | 107.0123 |
| 17 <sup>1</sup> | Quercetin (3,3',4',5,7-Pentahydroxyflavone)                           | C <sub>15</sub> H <sub>10</sub> O <sub>7</sub>  | 27.57 |                    | 301.03483          | 273.0403 | 178.9976 | 151.0024 | 121.0280 | 107.0124 |
| 18 <sup>1</sup> | Naringenin (4',5,7-Trihydroxyflavanone)                               | C <sub>15</sub> H <sub>12</sub> O <sub>5</sub>  | 27.77 |                    | 271.06065          | 227.0704 | 177.0183 | 151.0024 | 119.0487 | 107.0123 |
| 19 <sup>1</sup> | Luteolin (3',4',5,7-Tetrahydroxyflavone)                              | C <sub>15</sub> H <sub>10</sub> O <sub>6</sub>  | 28.46 |                    | 285.03991          | 217.0500 | 199.0392 | 175.0387 | 151.0023 | 133.0281 |
| 20 <sup>1</sup> | Apigenin (4',5,7-Trihydroxyflavone)                                   | C <sub>15</sub> H <sub>10</sub> O <sub>5</sub>  | 30.31 |                    | 269.04500          | 225.0551 | 201.0556 | 151.0024 | 149.0232 | 117.0330 |
| 21              | Chrysoeriol (3'-Methoxy-4',5,7-trihydroxyflavone)                     | C <sub>16</sub> H <sub>12</sub> O <sub>6</sub>  | 30.53 |                    | 299.05556          | 284.0327 | 256.0374 | 227.0348 | 151.0023 | 107.0124 |
| 22              | Trihydroxy-trimethoxy(iso)flavone isomer I                            | C <sub>18</sub> H <sub>16</sub> O <sub>8</sub>  | 32.95 | 361.09235          |                    | 346.0680 | 345.0600 | 331.0444 | 317.0660 | 303.0492 |
| 23              | Dihydroxy-dimethoxy(iso)flavone                                       | C <sub>17</sub> H <sub>14</sub> O <sub>6</sub>  | 32.98 | 315.08686          |                    | 300.0628 | 299.0549 | 271.0600 | 257.0443 |          |
| 24              | Chrysin (5,7-Dihydroxyflavone)                                        | C <sub>15</sub> H <sub>10</sub> O <sub>4</sub>  | 33.86 | 255.06573          |                    | 209.0600 | 153.0182 | 129.0337 | 103.0546 | 67.0185  |
| 25              | Dimethoxy(iso)flavone                                                 | C <sub>17</sub> H <sub>14</sub> O <sub>4</sub>  | 34.16 | 283.09704          |                    | 268.0728 | 267.0647 | 239.0700 | 225.0533 |          |
| 26 <sup>1</sup> | Galangin (3,5,7-Trihydroxyflavone)                                    | C <sub>15</sub> H <sub>10</sub> O <sub>5</sub>  | 34.74 | 271.06065          |                    | 215.0697 | 197.0589 | 165.0148 | 153.0181 | 105.0338 |
| 27              | Trimethoxy(iso)flavone                                                | C <sub>18</sub> H <sub>16</sub> O <sub>5</sub>  | 35.01 | 313.10760          |                    | 298.0837 | 297.0757 | 280.0729 | 279.0652 | 252.0781 |
| 28              | Dihydroxy-methoxy(iso)flavone                                         | C <sub>16</sub> H <sub>12</sub> O <sub>5</sub>  | 35.11 | 285.07630          |                    | 270.0521 | 269.0446 | 242.0572 | 167.0339 | 119.0493 |
| 29              | Hydroxy-trimethoxy(iso)flavone                                        | C <sub>18</sub> H <sub>16</sub> O <sub>6</sub>  | 36.92 | 329.10251          |                    | 314.0781 | 313.0708 | 299.0548 | 271.0599 |          |
| 30              | Hydroxy-methoxy(iso)flavone                                           | C <sub>16</sub> H <sub>12</sub> O <sub>4</sub>  | 38.10 | 269.08138          |                    | 254.0572 | 226.0622 | 167.0339 |          |          |
| 31              | Linoleamide                                                           | C <sub>18</sub> H <sub>33</sub> NO              | 44.47 | 280.26404          |                    | 263.2369 | 245.2264 | 109.1015 | 95.0860  | 81.0704  |

|    |          |                                    |       |           |  |          |          |          |         |         |
|----|----------|------------------------------------|-------|-----------|--|----------|----------|----------|---------|---------|
| 32 | Oleamide | C <sub>18</sub> H <sub>35</sub> NO | 45.76 | 282.27969 |  | 265.2526 | 247.2420 | 135.1171 | 83.0861 | 69.0705 |
|----|----------|------------------------------------|-------|-----------|--|----------|----------|----------|---------|---------|

<sup>1</sup>Confirmed by the standard.

**Table S2.** Chemical composition of mature somatic embryo extract.

| No.             | Name                                                                  | Formula                                         | Rt    | [M+H] <sup>+</sup> | [M-H] <sup>-</sup> | Fra1     | Fra 2    | Fra 3    | Fra 4    | Fra 5    |
|-----------------|-----------------------------------------------------------------------|-------------------------------------------------|-------|--------------------|--------------------|----------|----------|----------|----------|----------|
| 1               | Trigonelline                                                          | C <sub>7</sub> H <sub>7</sub> NO <sub>2</sub>   | 1.26  | 138.05550          |                    | 110.0603 | 96.0450  | 94.0656  | 92.0499  | 65.0392  |
| 2               | Nicotinic acid (Niacin)                                               | C <sub>6</sub> H <sub>5</sub> NO <sub>2</sub>   | 1.54  | 124.03986          |                    | 96.0449  | 80.0501  | 78.0345  |          |          |
| 3               | Nicotinamide                                                          | C <sub>6</sub> H <sub>6</sub> N <sub>2</sub> O  | 1.63  | 123.05584          |                    | 106.0290 | 96.0449  | 80.0500  |          |          |
| 6               | Dihydroxybenzoic acid                                                 | C <sub>7</sub> H <sub>6</sub> O <sub>4</sub>    | 10.41 |                    | 153.01879          | 123.0073 | 109.0279 | 108.0201 | 95.0123  | 85.0278  |
| 7               | Caffeic acid                                                          | C <sub>9</sub> H <sub>8</sub> O <sub>4</sub>    | 15.17 |                    | 179.03444          | 135.0438 | 107.0489 |          |          |          |
| 8 <sup>1</sup>  | Taxifolin (Dihydroquercetin)                                          | C <sub>15</sub> H <sub>12</sub> O <sub>7</sub>  | 19.90 |                    | 303.05048          | 285.0403 | 177.0177 | 175.0384 | 153.0183 | 125.0228 |
| 10              | Eriodictyol-O-hexoside                                                | C <sub>21</sub> H <sub>22</sub> O <sub>11</sub> | 20.79 |                    | 449.10839          | 287.0563 | 151.0024 | 135.0438 | 107.0123 |          |
| 9               | cis-3-[(4-hydroxy-3-Methoxyphenyl) prop-2-enoyl]oxybutanedioic acid   | C <sub>14</sub> H <sub>14</sub> O <sub>8</sub>  | 20.90 | 311.07670          |                    | 177.0546 | 149.0597 | 145.0284 | 117.0337 | 89.0390  |
| 11              | trans-3-[(4-hydroxy-3-Methoxyphenyl) prop-2-enoyl]oxybutanedioic acid | C <sub>14</sub> H <sub>14</sub> O <sub>8</sub>  | 21.45 | 311.07670          |                    | 177.0546 | 149.0597 | 145.0284 | 117.0337 | 89.0390  |
| 33              | Quercetin-O-pentosylhexoside                                          | C <sub>26</sub> H <sub>28</sub> O <sub>16</sub> | 21.56 |                    | 595.12991          | 301.0354 | 300.0275 | 271.0247 | 255.0296 | 178.9975 |
| 12              | Luteolin-O-hexoside isomer 1                                          | C <sub>21</sub> H <sub>20</sub> O <sub>11</sub> | 22.35 |                    | 447.09274          | 327.0499 | 285.0404 | 284.0327 | 256.0367 | 151.0021 |
| 13              | Luteolin-O-hexoside isomer 2                                          | C <sub>21</sub> H <sub>20</sub> O <sub>11</sub> | 22.83 |                    | 447.09274          | 327.0499 | 285.0405 | 284.0328 | 256.0369 | 151.0024 |
| 14              | Hyperoside (Quercetin-3-O-galactoside)                                | C <sub>21</sub> H <sub>20</sub> O <sub>12</sub> | 23.23 |                    | 463.08765          | 301.0349 | 300.0275 | 271.0248 | 255.0298 | 178.9971 |
| 15 <sup>1</sup> | Isoquercitrin (Quercetin-3-O-glucoside)                               | C <sub>21</sub> H <sub>20</sub> O <sub>12</sub> | 23.43 |                    | 463.08765          | 301.0360 | 300.0275 | 271.0248 | 255.0296 | 178.9975 |
| 16 <sup>1</sup> | Eriodictyol (3',4',5,7-Tetrahydroxyflavanone)                         | C <sub>15</sub> H <sub>12</sub> O <sub>6</sub>  | 25.42 |                    | 287.05556          | 269.0461 | 151.0024 | 135.0438 | 125.0229 | 107.0123 |
| 17 <sup>1</sup> | Quercetin (3,3',4',5,7-Pentahydroxyflavone)                           | C <sub>15</sub> H <sub>10</sub> O <sub>7</sub>  | 27.55 |                    | 301.03483          | 273.0412 | 178.9975 | 151.0024 | 121.0280 | 107.0124 |
| 18 <sup>1</sup> | Naringenin (4',5,7-Trihydroxyflavanone)                               | C <sub>15</sub> H <sub>12</sub> O <sub>5</sub>  | 27.75 |                    | 271.06065          | 227.0709 | 177.0181 | 151.0023 | 119.0487 | 107.0123 |
| 19 <sup>1</sup> | Luteolin (3',4',5,7-Tetrahydroxyflavone)                              | C <sub>15</sub> H <sub>10</sub> O <sub>6</sub>  | 28.42 |                    | 285.03991          | 217.0499 | 199.0393 | 175.0390 | 151.0024 | 133.0281 |
| 20 <sup>1</sup> | Apigenin (4',5,7-Trihydroxyflavone)                                   | C <sub>15</sub> H <sub>10</sub> O <sub>5</sub>  | 30.27 |                    | 269.04500          | 225.0554 | 201.0545 | 151.0020 | 149.0229 | 117.0330 |
| 21              | Chrysoeriol (3'-Methoxy-4',5,7-trihydroxyflavone)                     | C <sub>16</sub> H <sub>12</sub> O <sub>6</sub>  | 30.49 |                    | 299.05556          | 284.0328 | 256.0371 | 227.0366 | 151.0020 | 107.0124 |
| 34              | Dihydroxy-trimethoxy(iso)flavone isomer 1                             | C <sub>17</sub> H <sub>14</sub> O <sub>7</sub>  | 31.06 |                    | 329.06613          | 314.0436 | 313.0363 | 299.0196 | 271.0252 | 227.0345 |
| 22              | Trihydroxy-trimethoxy(iso)flavone isomer I                            | C <sub>18</sub> H <sub>16</sub> O <sub>8</sub>  | 32.93 | 361.09235          |                    | 346.0685 | 345.0616 | 331.0439 | 317.0653 | 303.0499 |
| 23              | Dihydroxy-dimethoxy(iso)flavone                                       | C <sub>17</sub> H <sub>14</sub> O <sub>6</sub>  | 32.96 | 315.08686          |                    | 300.0629 | 299.0549 | 271.0602 | 257.0445 |          |
| 35              | Dihydroxy-trimethoxy(iso)flavone isomer 2                             | C <sub>17</sub> H <sub>14</sub> O <sub>7</sub>  | 33.34 |                    | 329.06613          | 314.0435 | 299.0197 | 271.0246 |          |          |
| 24              | Chrysin (5,7-Dihydroxyflavone)                                        | C <sub>15</sub> H <sub>10</sub> O <sub>4</sub>  | 33.84 | 255.06573          |                    | 209.0597 | 153.0183 | 129.0337 | 103.0547 | 67.0186  |
| 25              | Dimethoxy(iso)flavone                                                 | C <sub>17</sub> H <sub>14</sub> O <sub>4</sub>  | 34.13 | 283.09704          |                    | 268.0729 | 267.0644 | 239.0701 | 225.0542 |          |
| 26 <sup>1</sup> | Galangin (3,5,7-Trihydroxyflavone)                                    | C <sub>15</sub> H <sub>10</sub> O <sub>5</sub>  | 34.72 | 271.06065          |                    | 215.0700 | 197.0598 | 165.0148 | 153.0180 | 105.0338 |
| 27              | Trimethoxy(iso)flavone                                                | C <sub>18</sub> H <sub>16</sub> O <sub>5</sub>  | 34.97 | 313.10760          |                    | 298.0837 | 297.0757 | 280.0730 | 279.0650 | 252.0779 |
| 28              | Dihydroxy-methoxy(iso)flavone                                         | C <sub>16</sub> H <sub>12</sub> O <sub>5</sub>  | 35.09 | 285.07630          |                    | 270.0520 | 269.0440 | 242.0573 | 167.0341 | 119.0492 |

|    |                                |                                                |       |           |  |          |          |          |          |         |
|----|--------------------------------|------------------------------------------------|-------|-----------|--|----------|----------|----------|----------|---------|
| 29 | Hydroxy-trimethoxy(iso)flavone | C <sub>18</sub> H <sub>16</sub> O <sub>6</sub> | 36.89 | 329.10251 |  | 314.0781 | 313.0704 | 299.0548 | 271.0599 |         |
| 30 | Hydroxy-methoxy(iso)flavone    | C <sub>16</sub> H <sub>12</sub> O <sub>4</sub> | 38.07 | 269.08138 |  | 254.0574 | 226.0624 | 167.0341 |          |         |
| 31 | Linoleamide                    | C <sub>18</sub> H <sub>33</sub> NO             | 44.45 | 280.26404 |  | 263.2369 | 245.2265 | 109.1016 | 95.0860  | 81.0705 |
| 32 | Oleamide                       | C <sub>18</sub> H <sub>35</sub> NO             | 45.71 | 282.27969 |  | 265.2528 | 247.2419 | 135.1169 | 83.0861  | 69.0705 |

<sup>1</sup>Confirmed by the standard.

**Table S3.** Chemical composition of germinated somatic embryo extract.

| No.             | Name                                                                  | Formula                                         | Rt    | [M+H] <sup>+</sup> | [M-H] <sup>-</sup> | Fra 1    | Fra 2    | Fra 3    | Fra 4    | Fra 5    |
|-----------------|-----------------------------------------------------------------------|-------------------------------------------------|-------|--------------------|--------------------|----------|----------|----------|----------|----------|
| 1               | Trigonelline                                                          | C <sub>7</sub> H <sub>7</sub> NO <sub>2</sub>   | 1.26  | 138.05550          |                    | 110.0604 | 96.0449  | 94.0656  | 92.0499  | 65.0392  |
| 2               | Nicotinic acid (Niacin)                                               | C <sub>6</sub> H <sub>5</sub> NO <sub>2</sub>   | 1.48  | 124.03986          |                    | 96.0449  | 80.0501  | 78.0345  |          |          |
| 3               | Nicotinamide                                                          | C <sub>6</sub> H <sub>6</sub> N <sub>2</sub> O  | 1.61  | 123.05584          |                    | 106.0291 | 96.0449  | 80.0501  |          |          |
| 4 <sup>1</sup>  | Gallic acid (3,4,5-Trihydroxybenzoic acid)                            | C <sub>7</sub> H <sub>6</sub> O <sub>5</sub>    | 2.68  |                    | 169.01370          | 125.0230 | 97.0278  | 81.0330  | 69.0329  |          |
| 6               | Dihydroxybenzoic acid                                                 | C <sub>7</sub> H <sub>6</sub> O <sub>4</sub>    | 10.43 |                    | 153.01879          | 123.0073 | 109.0280 | 108.0202 | 95.0123  | 85.0279  |
| 7               | Caffeic acid                                                          | C <sub>9</sub> H <sub>8</sub> O <sub>4</sub>    | 15.18 |                    | 179.03444          | 135.0438 | 107.0488 |          |          |          |
| 8 <sup>1</sup>  | Taxifolin (Dihydroquercetin)                                          | C <sub>15</sub> H <sub>12</sub> O <sub>7</sub>  | 19.92 |                    | 303.05048          | 285.0404 | 177.0183 | 175.0391 | 153.0179 | 125.0229 |
| 9               | cis-3-[(4-hydroxy-3-Methoxyphenyl)-prop-2-enoyl]oxybutanedioic acid   | C <sub>14</sub> H <sub>14</sub> O <sub>8</sub>  | 20.78 | 311.07670          |                    | 177.0546 | 149.0597 | 145.0284 | 117.0337 | 89.0391  |
| 10              | Eriodictyol-O-hexoside                                                | C <sub>21</sub> H <sub>22</sub> O <sub>11</sub> | 20.85 |                    | 449.10839          | 287.0562 | 151.0024 | 135.0438 | 107.0123 |          |
| 11              | trans-3-[(4-hydroxy-3-methoxyphenyl) prop-2-enoyl]oxybutanedioic acid | C <sub>14</sub> H <sub>14</sub> O <sub>8</sub>  | 21.45 | 311.07670          |                    | 177.0546 | 149.0598 | 145.0284 | 117.0337 | 89.0390  |
| 12              | Luteolin-O-hexoside isomer 1                                          | C <sub>21</sub> H <sub>20</sub> O <sub>11</sub> | 22.39 |                    | 447.09274          | 327.0509 | 285.0405 | 284.0331 | 256.0380 | 151.0024 |
| 14              | Hyperoside (Quercetin-3-O-galactoside)                                | C <sub>21</sub> H <sub>20</sub> O <sub>12</sub> | 23.22 |                    | 463.08765          | 301.0361 | 300.0277 | 271.0248 | 255.0298 | 178.9975 |
| 15 <sup>1</sup> | Isoquercitrin (Quercetin-3-O-glucoside)                               | C <sub>21</sub> H <sub>20</sub> O <sub>12</sub> | 23.44 |                    | 463.08765          | 301.0359 | 300.0277 | 271.0248 | 255.0297 | 178.9975 |
| 16 <sup>1</sup> | Eriodictyol (3',4',5,7-Tetrahydroxyflavanone)                         | C <sub>15</sub> H <sub>12</sub> O <sub>6</sub>  | 25.43 |                    | 287.05556          | 269.0454 | 151.0024 | 135.0439 | 125.0230 | 107.0124 |
| 17 <sup>1</sup> | Quercetin (3,3',4',5,7-Pentahydroxyflavone)                           | C <sub>15</sub> H <sub>10</sub> O <sub>7</sub>  | 27.55 |                    | 301.03483          | 273.0410 | 178.9976 | 151.0024 | 121.0280 | 107.0124 |
| 18 <sup>1</sup> | Naringenin (4',5,7-Trihydroxyflavanone)                               | C <sub>15</sub> H <sub>12</sub> O <sub>5</sub>  | 27.76 |                    | 271.06065          | 227.0712 | 177.0183 | 151.0024 | 119.0488 | 107.0124 |
| 19 <sup>1</sup> | Luteolin (3',4',5,7-Tetrahydroxyflavone)                              | C <sub>15</sub> H <sub>10</sub> O <sub>6</sub>  | 28.42 |                    | 285.03991          | 217.0497 | 199.0391 | 175.0388 | 151.0024 | 133.0282 |
| 20 <sup>1</sup> | Apigenin (4',5,7-Trihydroxyflavone)                                   | C <sub>15</sub> H <sub>10</sub> O <sub>5</sub>  | 30.26 |                    | 269.04500          | 225.0552 | 201.0544 | 151.0025 | 149.0232 | 117.0331 |
| 36 <sup>1</sup> | Isorhamnetin (3'-Methoxy-3,4',5,7-tetrahydroxyflavone)                | C <sub>16</sub> H <sub>12</sub> O <sub>7</sub>  | 30.41 |                    | 315.05048          | 300.0276 | 283.0247 | 271.0249 | 164.0105 | 151.0026 |
| 22              | Trihydroxy-trimethoxy(iso)flavone isomer I                            | C <sub>18</sub> H <sub>16</sub> O <sub>8</sub>  | 31.35 | 361.09235          |                    | 346.0681 | 345.0606 | 331.0447 | 317.0661 | 303.0498 |
| 37              | Rhamnetin (7-Methoxy-3,3',4',5-tetrahydroxyflavone)                   | C <sub>16</sub> H <sub>12</sub> O <sub>7</sub>  | 32.41 |                    | 315.05048          | 300.0273 | 193.0135 | 165.0181 | 121.0281 | 97.0280  |
| 38              | Trihydroxy-trimethoxy(iso)flavone isomer II                           | C <sub>18</sub> H <sub>16</sub> O <sub>8</sub>  | 32.94 | 361.09235          |                    | 346.0680 | 345.0609 | 331.0452 | 317.0654 | 303.0490 |
| 23              | Dihydroxy-dimethoxy(iso)flavone                                       | C <sub>17</sub> H <sub>14</sub> O <sub>6</sub>  | 32.96 | 315.08686          |                    | 300.0628 | 299.0549 | 271.0601 | 257.0446 |          |
| 24              | Chrysin (5,7-Dihydroxyflavone)                                        | C <sub>15</sub> H <sub>10</sub> O <sub>4</sub>  | 33.84 | 255.06573          |                    | 209.0594 | 153.0183 | 129.0335 | 103.0546 | 67.0184  |
| 25              | Dimethoxy(iso)flavone                                                 | C <sub>17</sub> H <sub>14</sub> O <sub>4</sub>  | 34.13 | 283.09704          |                    | 268.0729 | 267.0653 | 239.0701 | 225.0549 |          |
| 26 <sup>1</sup> | Galangin (3,5,7-Trihydroxyflavone)                                    | C <sub>15</sub> H <sub>10</sub> O <sub>5</sub>  | 34.72 | 271.06065          |                    | 215.0700 | 197.0596 | 165.0148 | 153.0181 | 105.0338 |

|    |                                |                                                |       |           |  |          |          |          |          |          |
|----|--------------------------------|------------------------------------------------|-------|-----------|--|----------|----------|----------|----------|----------|
| 27 | Trimethoxy(iso)flavone         | C <sub>18</sub> H <sub>16</sub> O <sub>5</sub> | 34.99 | 313.10760 |  | 298.0837 | 297.0757 | 280.0729 | 279.0647 | 252.0779 |
| 28 | Dihydroxy-methoxy(iso)flavone  | C <sub>16</sub> H <sub>12</sub> O <sub>5</sub> | 35.05 | 285.07630 |  | 270.0523 | 269.0445 | 242.0573 | 167.0340 | 119.0492 |
| 29 | Hydroxy-trimethoxy(iso)flavone | C <sub>18</sub> H <sub>16</sub> O <sub>6</sub> | 36.90 | 329.10251 |  | 314.0785 | 313.0693 | 299.0549 | 271.0601 |          |
| 30 | Hydroxy-methoxy(iso)flavone    | C <sub>16</sub> H <sub>12</sub> O <sub>4</sub> | 38.07 | 269.08138 |  | 254.0573 | 226.0623 | 167.0338 |          |          |
| 31 | Linoleamide                    | C <sub>18</sub> H <sub>33</sub> NO             | 44.45 | 280.26404 |  | 263.2369 | 245.2262 | 109.1015 | 95.0860  | 81.0705  |
| 32 | Oleamide                       | C <sub>18</sub> H <sub>35</sub> NO             | 45.74 | 282.27969 |  | 265.2528 | 247.2417 | 135.1168 | 83.0861  | 69.0705  |

<sup>1</sup>Confirmed by the standard.

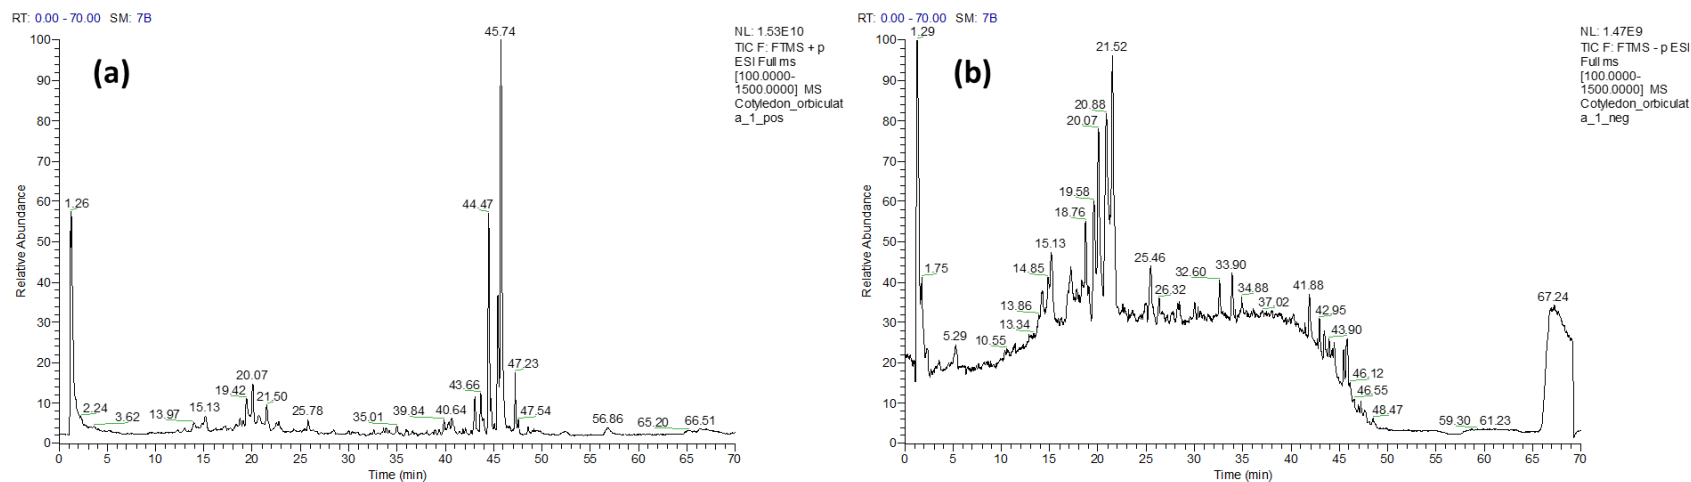

**Figure S1.** Total ion chromatogram of early somatic embryos extract of *C. orbiculata* in positive (a) and negative (b) mode.

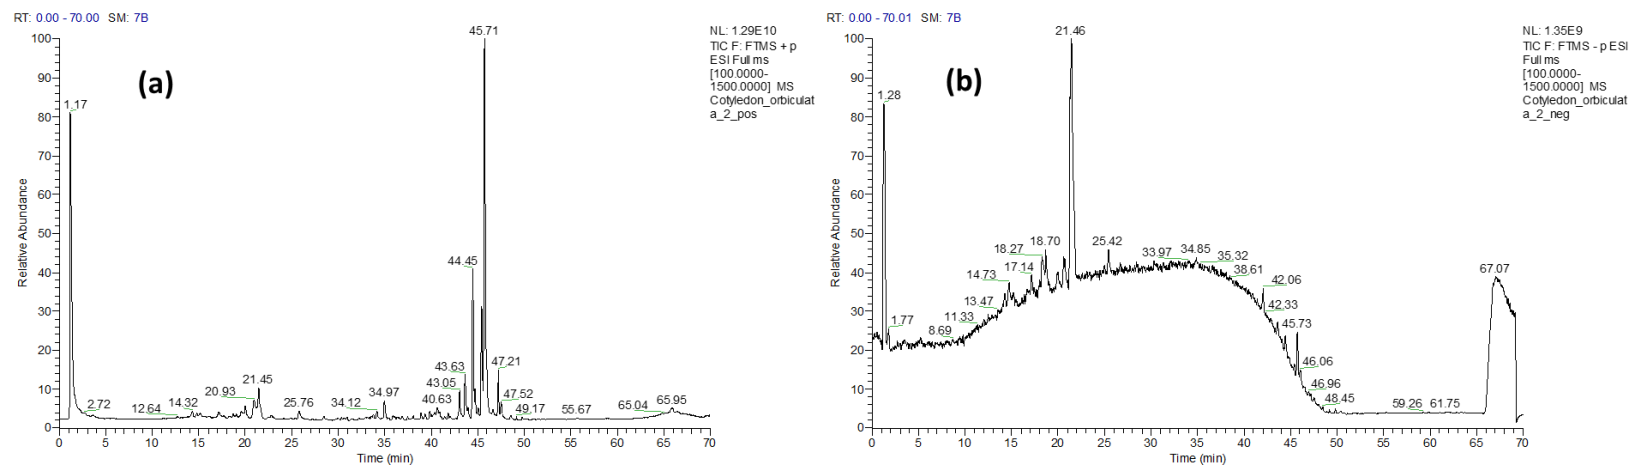

**Figure S2.** Total ion chromatogram of mature somatic embryos extract of *C. orbiculata* in positive (a) and negative (b) mode.



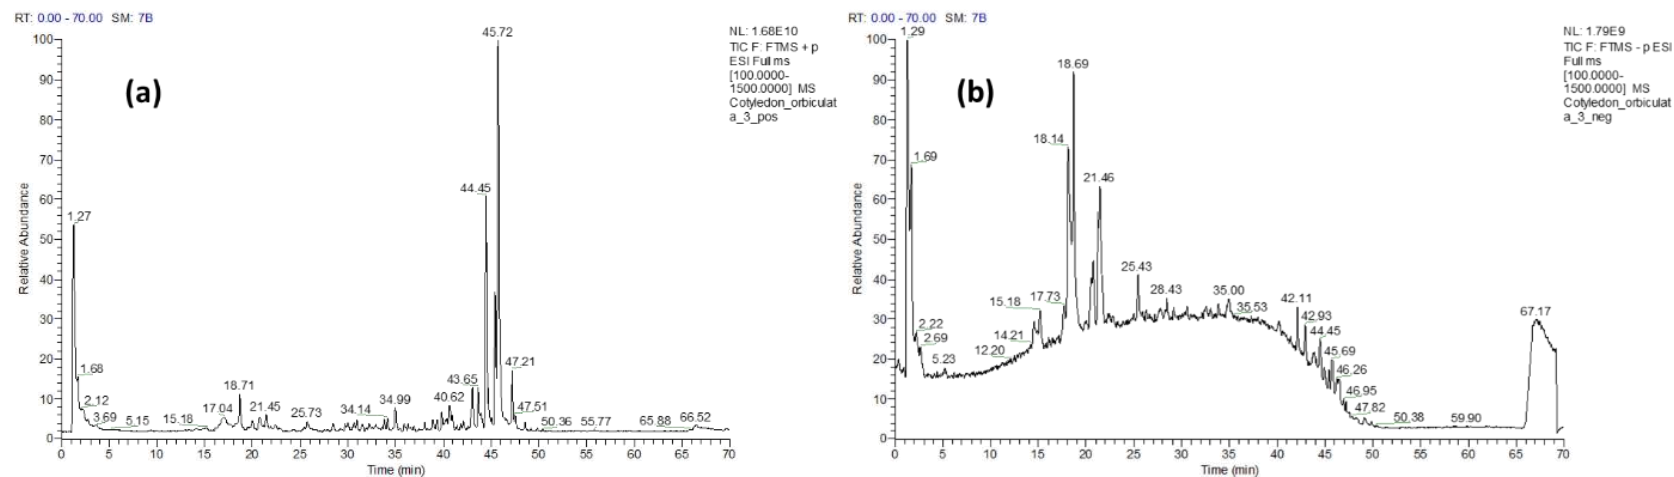

**Figure S3.** Total ion chromatogram of germinated somatic embryos extract of *C. orbiculata* in positive (a) and negative (b) mode.
